# Supplementary material for: Ce-induced regulation of electron density enhanced the catalytic activity of Co-Mn oxides for water oxidation
Source: Royal Society of Chemistry journal article supplement (doi:10.1039/d2cc04415c), 2022-01-01
Supplement: d2cc04415c1.pdf [file d2cc04415c1.pdf]

# Ce-induced regulation of electron density enhanced the catalytic activity of Co-Mn oxides for water oxidation

Wang Wang, Youcheng Hu, Shengli Chen\*

Hubei Electrochemical Power Sources Key Laboratory, Department of Chemistry, Wuhan University, Wuhan 430072, China. Email: slchen@whu.edu.cn

## Experimental section

**Materials and Reagent:** The following chemicals were used as received without any further purification:  $\text{Co}(\text{NO}_3)_2 \cdot 6\text{H}_2\text{O}$  (99%, Sinopharm Chemical Reagent Co. Ltd),  $\text{Ce}(\text{NO}_3)_3 \cdot 6\text{H}_2\text{O}$  (99%, Sinopharm Chemical Reagent Co. Ltd), KOH (99%, Sinopharm Chemical Reagent Co. Ltd),  $\text{Mn}(\text{NO}_3)_2$  50% aqueous solution (Sinopharm Chemical Reagent Co. Ltd), Ethanol (95%, Sinopharm Chemical Reagent Co. Ltd).

**Synthesis:** Typically, a piece of Ti mesh (2 cm x 1 cm) was firstly washed in ethanol and UP water for 15 minutes by ultrasonication. A 40 ml solution containing 0.2 mol/L  $\text{Co}^{2+}$  and 0.1 mol/L  $\text{Mn}^{2+}$  was used as electrolyte for the electrodeposition of the CMO. For the electrodeposition of CMCO, 14 mg of  $\text{Ce}(\text{NO}_3)_3 \cdot 6\text{H}_2\text{O}$  was added to the above solution. For the electrodeposition, the Ti mesh was immersed into the electrolyte (1  $\text{cm}^2$ ) and used as the working electrode; the graphite rod was used as the counter electrode. The electrodeposition was conducted at a current of 4.5 mA for 120 seconds. After electrodeposition, the Ti mesh was washed with UP water and annealed at 350 °C in air for 2 h to obtain the catalysts.

**Characterization:** Powder X-ray diffraction (XRD) patterns were performed on a Smartlab SE X-ray diffractometer with a Cu K $\alpha$  radiation source. The morphologies and sizes of the samples were observed by using a Zeiss Merlin Compact scanning electron microscope (SEM) and a FEI Tecnai G2 F20 transmission electron microscope (TEM). X-ray photoelectron spectroscopy (XPS) measurement was carried out with a Thermo Fischer Nexsa spectrophotometer.

**Electrochemical Measurements:** the electrochemical properties of all samples were measured by using a CHI 760E electrochemical analyzer (CH Instruments, Chenhua Co., Shanghai, People's Republic of China) in a three-electrode system at  $25 \pm 1^\circ\text{C}$ . A freshly made reversible hydrogen electrode and a graphite rod were used as the working electrode, reference electrode, and counter electrode, respectively. The potentials were reported with respect to the reversible hydrogen electrode (RHE). The LSV curves were recorded at a scan rate of 5 mV/s. The CV curves were recorded at a scan rate of 50mV/s. Solutions of 1 M KOH was used as the electrolytes.

**DFT calculations:** the DFT calculations of spin-polarization in this article were performed by the Vienna ab initio simulation package (VASP)<sup>1,2</sup> with the generalized gradient approximation (GGA) of Perdew–Burke–Ernzerhof (PBE)<sup>3</sup>. A plane-wave energy cut-off of 400 eV was used in the expansion of the electronic wave function and the convergence threshold was  $10^{-5}$  eV in energy and

0.05 eV/Å in force for electronic relaxation and ion relaxation, respectively. Hubbard correction<sup>4</sup> was included because of the existence of transition metal oxide with a  $U$  value of 4.0 eV and 2.0 eV for Mn and Co, respectively.<sup>5</sup> Monkhorst-Pack  $k$  points is  $2 \times 2 \times 1$  for all the structures considered in this paper with gamma method for all the calculations in the article. The vacuum space of all the structures in the article was set 15 Å. For  $\text{Co}_2\text{MnO}_4$  and Ce doped  $\text{Co}_2\text{MnO}_4$ , (110) plane is chosen. The computational hydrogen electrode (CHE) model<sup>6</sup> which used half of the chemical potential of  $\text{H}_2$  instead of the chemical potential of  $\text{H}^+$  was used to calculate proton-coupled electron transfer (PCET) thermodynamics of the oxygen evolution reactions in these structures. The entropies and zero-point-energies (ZPE) of  $\text{H}_2$  molecule,  $\text{H}_2\text{O}$  molecule and ZPE of adsorbed oxygenated species ( $^*\text{O}_x\text{H}_y$ ) were referred to the literature.<sup>6</sup>

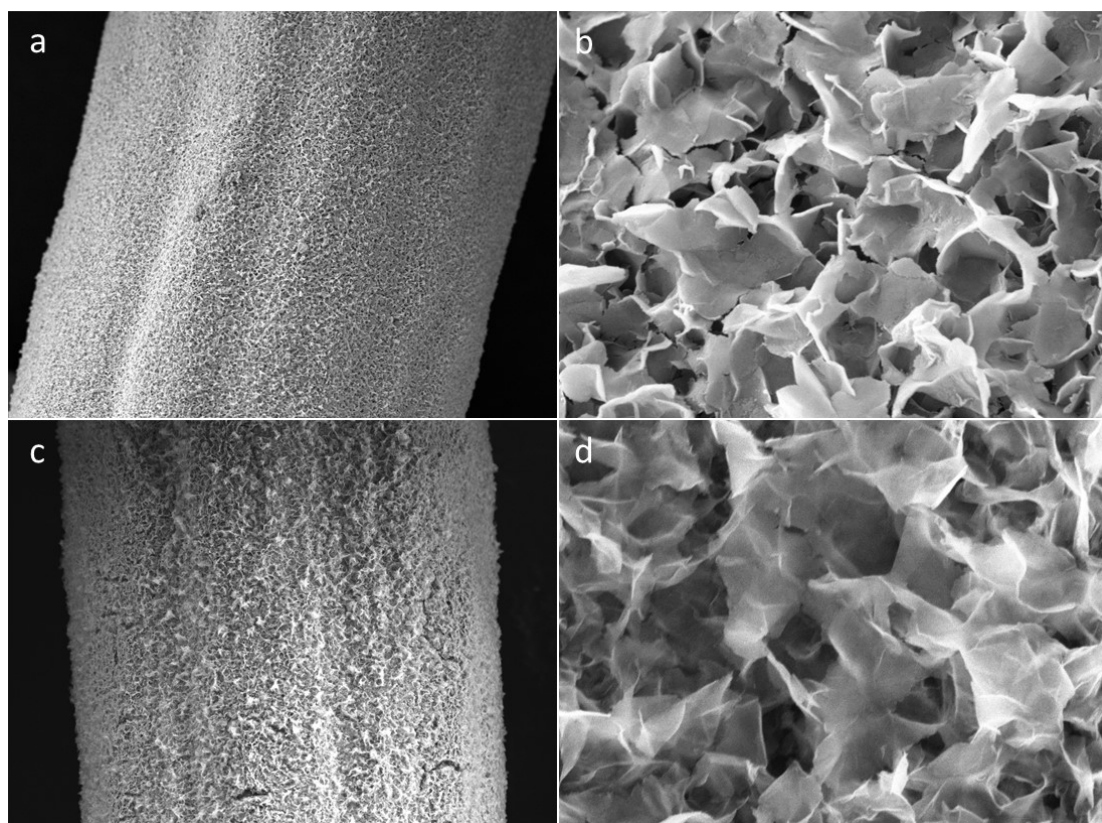

Figure S1. The SEM of CMO (a, b) and CMCO (c, d)

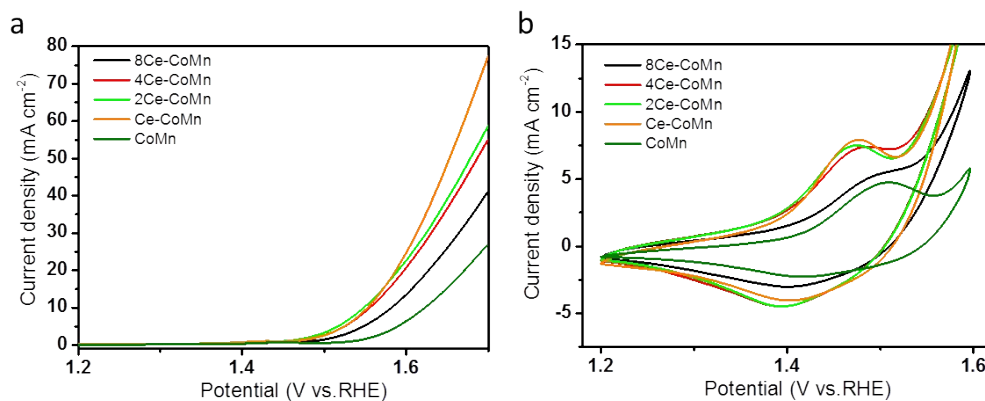

Figure S2. The polarization curves (a) and CV curves (b) of the catalysts with different Ce content used during the electrodeposition. The x in xCe-CoMn represents the x times of Ce is used for the synthesis comparing to that of Ce-CoMn.

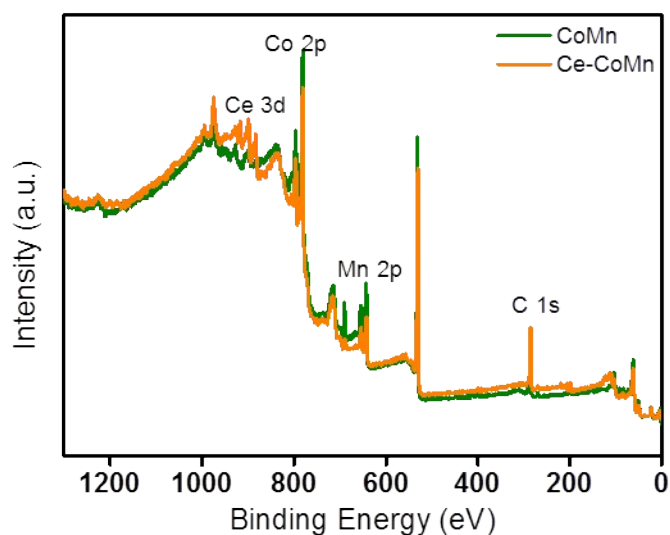

Figure S3. The XPS survey of CMO and CMCO.

Table S1. The comparison of the catalysts with the representative Co- and Mn-based catalysts

| Catalysts                                                          | Overpotential | References                                  |
|--------------------------------------------------------------------|---------------|---------------------------------------------|
| NiCoO <sub>2</sub> @CeO <sub>2</sub>                               | 380           | Anal. Chem., 2020, 92, 16267.               |
| MnCo <sub>2</sub> O <sub>4</sub>                                   | 400           | Dalton Trans., 2017, 46, 14382.             |
| RuO <sub>2</sub> /CeO <sub>2</sub>                                 | 350           | Int. J. Hydrogen. Energy., 2020, 45, 18635  |
| Ce-NiO-E                                                           | 382           | Adv. Funct. Mater. 2018, 1706056            |
| Co <sub>x</sub> Ni <sub>1-x</sub> Fe <sub>2</sub> O <sub>4</sub>   | 381           | ACS Appl. Mater. Interfaces 2017, 9, 13132  |
| MnFe <sub>2</sub> O <sub>4</sub> /NiCo <sub>2</sub> O <sub>4</sub> | 330           | Appl. Catal. B: Environ. 2018, 236, 413–419 |

|                                                    |     |                                                       |
|----------------------------------------------------|-----|-------------------------------------------------------|
| NiCo/NLG-270                                       | 340 | Adv. Mater. 2018, 30, 1800005                         |
| $\beta$ -MnO <sub>2</sub>                          | 550 | Energy Environ. Sci., 2013, 6, 2222–2232              |
| $\alpha$ -MnO <sub>2</sub>                         | 490 | J. Am. Chem. Soc., 2014, 136, 11452–11464             |
| Defective $\delta$ -MnO <sub>2</sub><br>nanosheets | 320 | Adv. Energy Mater. 2017, 7, 1700005.                  |
| AMnO <sub>x</sub> H <sub>y</sub> /C                | 350 | J. Energy Chem. 2022, 71, 580-587                     |
| Nanowire MnO <sub>2</sub>                          | 442 | J. Power Sources. 2020,461 228131                     |
| Ni <sub>x</sub> Co <sub>3-x</sub> O <sub>4</sub>   | 337 | ACS Appl. Mater. Interfaces 2017, 9, 31777–<br>31785. |
| Co <sub>3</sub> O <sub>4</sub> NC                  | 380 | Chem. Commun. 2015,<br>51, 8066-8069.                 |
| CMCO                                               | 390 | This work                                             |
| CMO                                                | 317 | This work                                             |

## References

1. G. Kresse and J. Furthmüller, *Comput. Mater. Sci.*, 1996, **6**, 15-50.
2. G. Kresse and J. Furthmüller, *Phys. Rev. B*, 1996, **54**, 11169-11186.
3. J. P. Perdew, K. Burke and M. Ernzerhof, *Phys. Rev. Lett.*, 1996, **77**, 3865-3868.
4. S. L. Dudarev, G. A. Botton, S. Y. Savrasov, C. J. Humphreys and A. P. Sutton, *Phys. Rev. B*, 1998, **57**, 1505-1509.
5. Zasada, F., Grybos, J., Indyka, P., Piskorz, W., Kaczmarczyk, J., & Sojka, Z. (2014). *The Journal of Physical Chemistry C* 118.33 (2014): 19085-19097..
6. J. K. Nørskov, J. Rossmeisl, A. Logadottir, L. Lindqvist, J. R. Kitchin, T. Bligaard and H. Jónsson, *J. Phys. Chem. B*, 2004, **108**, 17886-17892.
